# Supplementary material for: Outbreak of Sudden Death with Acute Encephalitis Syndrome Among Children Associated with Exposure to Lychee Orchards in Northern Bangladesh, 2012
Source: PubMed Central journal article supplement (PMC5590581; doi:10.4269/ajtmh.16-0856), 2017-07-24
Supplement: tpmd160856.SD1.pdf [file tpmd160856.SD1.pdf]

SUPPLEMENTAL TABLE 1

Proportion of cases with missing exposure information compared with nearby village controls, northern Bangladesh, 2012

| Exposures                                                                 | Case n/N (%) | Control n/N (%) | P value   |
|---------------------------------------------------------------------------|--------------|-----------------|-----------|
| <b>Exposures in the 24 hours preceding illness onset of case-patients</b> |              |                 |           |
| <b>Food</b>                                                               |              |                 |           |
| Tube well water                                                           | 0/14 (0.0)   | 1/56 (1.8)      | 0.614     |
| Lychee                                                                    | 0/14 (0.0)   | 25/56 (45)      | 0.002     |
| Mango                                                                     | 0/14 (0.0)   | 30/56 (54)      | < 0.001   |
| Papaya                                                                    | 0/14 (0.0)   | 21/56 (38)      | 0.006     |
| Potato                                                                    | 0/14 (0.0)   | 14/56 (25)      | 0.036     |
| Ladies finger                                                             | 0/14 (0.0)   | 28/56 (50)      | < 0.001   |
| Egg plant                                                                 | 0/14 (0.0)   | 36/56 (64)      | < 0.001   |
| Tomato                                                                    | 0/14 (0.0)   | 28/56 (50)      | < 0.001   |
| Banana                                                                    | 0/14 (0.0)   | 30/56 (54)      | < 0.001   |
| Bitter gourd                                                              | 0/14 (0.0)   | 24/56 (43)      | < 0.003   |
| Corn                                                                      | 1/14 (7.1)   | 21/56 (38)      | 0.028     |
| Lentils                                                                   | 0/14 (0.0)   | 34/56 (61)      | < 0.001   |
| <b>Environment</b>                                                        |              |                 |           |
| Visiting lychee orchard                                                   | 3/14 (21)    | 19/56 (34)      | 0.367     |
| Visiting a mango orchard                                                  | 1/14 (7.1)   | 16/56 (29)      | < 0.094   |
| Visiting a vegetable garden                                               | 0/14 (0.0)   | 2/56 (3.6)      | 0.473     |
| Visiting an orchard that leased for commercial production                 | 0/14 (0.0)   | 1/56 (1.8)      | 0.614     |
| <b>Exposures in the 3 days preceding illness onset of case-patients</b>   |              |                 |           |
| Visiting a lychee orchard                                                 | 1/14 (7.1)   | 6/56 (11)       | 0.690     |
| Visiting a mango orchard                                                  | 1/14 (7.1)   | 8/56 (14)       | 0.474     |
| Visiting a vegetable garden                                               | 0/14 (0.0)   | 6/56 (11)       | 0.200     |
| Visiting any garden that sprayed pesticides                               | 0/14 (0.0)   | 5/56 (8.9)      | 0.245     |
| Plucked lychees from the orchard                                          | 1/14 (7.1)   | 3/56 (5.4)      | 0.797     |
| Plucked mangoes from the orchard                                          | 0/14 (0.0)   | 2/56 (3.6)      | 0.473     |
| Visiting any garden while pesticides were being applied                   | 1/14 (7.1)   | 13/56 (23)      | 0.178     |
| <b>Other exposures</b>                                                    |              |                 |           |
| Having lychee orchard adjacent to the house                               | 0/14 (0.0)   | 0/56 (0.0)      | Undefined |
| Having mango orchard adjacent to the house                                | 0/14 (0.0)   | 0/56 (0.0)      | Undefined |
| Having vegetable garden adjacent to the house                             | 1/14 (7.1)   | 2/56 (3.6)      | 0.555     |
| Family members work in lychee orchard                                     | 0/14 (0.0)   | 3/56 (5.4)      | 0.375     |
| Family members work in mango orchard                                      | 0/14 (0.0)   | 2/56 (3.6)      | 0.473     |
| Family members work in vegetable garden                                   | 0/14 (0.0)   | 1/56 (1.8)      | 0.614     |
| Family members with occupation in agriculture                             | 1/14 (7.1)   | 5/56 (8.9)      | 0.830     |
| History of animal or insect bite                                          | 0/14 (0.0)   | 2/56 (3.6)      | 0.473     |

SUPPLEMENTAL TABLE 2

Proportion of cases with missing exposure information compared with neighborhood controls, northern Bangladesh, 2012

| Exposures                                                          | Case n/N (%) | Control n/N (%) | P value   |
|--------------------------------------------------------------------|--------------|-----------------|-----------|
| Exposures in the 24 hours preceding illness onset of case-patients |              |                 |           |
| Food                                                               |              |                 |           |
| Tube well water                                                    | 0/14 (0.0)   | 0/56 (0.0)      | Undefined |
| Lychee                                                             | 0/14 (0.0)   | 12/56 (21)      | 0.057     |
| Mango                                                              | 0/14 (0.0)   | 15/56 (27)      | 0.029     |
| Papaya                                                             | 0/14 (0.0)   | 16/56 (29)      | 0.022     |
| Potato                                                             | 0/14 (0.0)   | 11/56 (20)      | 0.070     |
| Ladies finger                                                      | 0/14 (0.0)   | 18/56 (32)      | 0.013     |
| Egg plant                                                          | 0/14 (0.0)   | 17/56 (30)      | 0.017     |
| Tomato                                                             | 0/14 (0.0)   | 15/56 (27)      | 0.029     |
| Banana                                                             | 0/14 (0.0)   | 16/56 (29)      | 0.022     |
| Bitter guard                                                       | 0/14 (0.0)   | 13/56 (23)      | 0.046     |
| Corn                                                               | 1/14 (7.1)   | 14/56 (25)      | 0.145     |
| Lentils                                                            | 0/14 (0.0)   | 18/56 (32)      | 0.013     |
| Environment                                                        |              |                 |           |
| Visiting lychee orchard                                            | 3/14 (21)    | 19/56 (34)      | 0.368     |
| Visiting a mango orchard                                           | 1/14 (7.1)   | 12/56 (21)      | 0.218     |
| Visiting a vegetable garden                                        | 0/14 (0.0)   | 2/56 (3.6)      | 0.473     |
| Visiting an orchard that leased for commercial production          | 0/14 (0.0)   | 2/56 (3.6)      | 0.473     |
| Exposures in the 3 days preceding illness onset of case-patients   |              |                 |           |
| Visiting a lychee orchard                                          | 1/14 (7.1)   | 0/56 (0.0)      | 0.044     |
| Visiting a mango orchard                                           | 1/14 (7.1)   | 2/56 (3.6)      | 0.555     |
| Visiting a vegetable garden                                        | 0/14 (0.0)   | 9/56 (16)       | 0.108     |
| Visiting any garden that sprayed pesticides                        | 0/14 (0.0)   | 0/56 (0.0)      | Undefined |
| Plucked lychees from the orchard                                   | 1/14 (7.1)   | 1/56 (1.8)      | 0.283     |
| Plucked mangoes from the orchard                                   | 0/14 (0.0)   | 0/56 (0.0)      | Undefined |
| Visiting any garden while pesticides were being applied            | 1/14 (7.1)   | 6/56 (11)       | 0.690     |
| Other exposures                                                    |              |                 |           |
| Having lychee orchard adjacent to the house                        | 0/14 (0.0)   | 0/56 (0.0)      | Undefined |
| Having mango orchard adjacent to the house                         | 0/14 (0.0)   | 0/56 (0.0)      | Undefined |
| Having vegetable garden adjacent to the house                      | 1/14 (7.1)   | 1/56 (1.8)      | 0.283     |
| Family members work in lychee orchard                              | 0/14 (0.0)   | 2/56 (3.6)      | 0.473     |
| Family members work in mango orchard                               | 0/14 (0.0)   | 0/56 (0.0)      | Undefined |
| Family members work in vegetable garden                            | 0/14 (0.0)   | 2/56 (3.6)      | 0.473     |
| Family members with occupation in agriculture                      | 1/14 (7.1)   | 3/56 (5.4)      | 0.797     |
| History of animal or insect bite                                   | 0/14 (0.0)   | 2/56 (3.6)      | 0.473     |
